# Supplementary material for: Fusobacterium nucleatum infection modulates the transcriptome and epigenome of HCT116 colorectal cancer cells in an oxygen-dependent manner
Source: Springer Nature journal article supplement (doi:10.1038/s42003-024-06201-w), 2024-05-08
Supplement: MOESM1 [file 42003_2024_6201_MOESM1_ESM.pdf]

## Supplementary Tables and Figures

**Supplementary Table 1.** H3K27ac ChIP-seq metadata. Abbreviations: NN: Normoxia - No Bacteria, NF: Normoxia - infection with *Fnn*, NE: Normoxia - infection with *E. coli*, HN: Hypoxia - No Bacteria, HF: Hypoxia - infection with *Fnn*, and HE: Hypoxia - infection with *E. coli*.

| Experimental group | Repli-<br>cate | Total<br>reads | Trimmed<br>reads | Aligned<br>reads | % duplicate<br>reads | Peaks | FRip   |
|--------------------|----------------|----------------|------------------|------------------|----------------------|-------|--------|
| NN                 | 1              | 13425098       | 12270795         | 11890069         | 70.9443              | 17833 | 7.50%  |
|                    | 2              | 18071088       | 17329893         | 16907358         | 74.3666              | 22160 | 10.03% |
| NE                 | 1              | 25000000       | 24898398         | 23618097         | 28.8138              | 28590 | 16.99% |
|                    | 2              | 14974664       | 14919732         | 14246577         | 39.684               | 32849 | 19.35% |
| NF                 | 1              | 17655910       | 17592292         | 15767488         | 43.4656              | 18455 | 9.54%  |
|                    | 2              | 25000000       | 24792337         | 21937958         | 42.898               | 19219 | 11.97% |
| HN                 | 1              | 17293043       | 17020373         | 12757427         | 62.063               | 37446 | 22.49% |
|                    | 2              | 23185060       | 22736499         | 19140035         | 50.8794              | 33606 | 15.72% |
| HE                 | 1              | 18319962       | 18210613         | 17070244         | 42.3342              | 44723 | 22.93% |
|                    | 2              | 25000000       | 24922168         | 23309318         | 35.3334              | 47621 | 23.55% |
| HF                 | 1              | 25000000       | 24624744         | 20366483         | 50.8853              | 34301 | 19.15% |
|                    | 2              | 19375219       | 18943094         | 15188467         | 53.3603              | 29804 | 17.94% |

**Supplementary Table 2.** RNA-seq metadata. Abbreviations: NN: Normoxia - No Bacteria, NF: Normoxia - infection with *Fnn*, NE: Normoxia - infection with *E. coli*, HN: Hypoxia - No Bacteria, HF: Hypoxia - infection with *Fnn*, and HE: Hypoxia - infection with *E. coli*.

| Experimental group | Replicate | Total reads | Aligned reads | % Aligned reads |
|--------------------|-----------|-------------|---------------|-----------------|
| NN                 | 1         | 9002005     | 8920009       | 99.09           |
|                    | 2         | 13399894    | 13282658      | 99.13           |
| NE                 | 1         | 14727006    | 14529738      | 98.66           |
|                    | 2         | 15474426    | 15254993      | 98.58           |
| NF                 | 1         | 13549539    | 13408193      | 98.96           |
|                    | 2         | 17936962    | 17761651      | 99.02           |
| HN                 | 1         | 13668761    | 13495696      | 98.73           |
|                    | 2         | 15085986    | 14883882      | 98.66           |
| HE                 | 1         | 14751367    | 14240998      | 96.54           |
|                    | 2         | 16620283    | 16008288      | 96.32           |
| HF                 | 1         | 14961090    | 14794994      | 98.89           |
|                    | 2         | 10913784    | 10783782      | 98.81           |

**Supplementary Table 3.** Differentially regulated transcription factors in *Fnn* infection of HCT116 cells subjected to hypoxia conditioning. Abbreviations: NN: Normoxia - No Bacteria, NF: Normoxia - infection with *Fnn*, HN: Hypoxia - No Bacteria, and HF: Hypoxia - infection with *Fnn*.

| NN-HN-specific           | NN-HF-specific      | Common to NN-HN and NN-HF |
|--------------------------|---------------------|---------------------------|
| PU.1:IRF8                | MYB77               | VRN1                      |
| Six2                     | NLP7                | ZNF467                    |
| ATHB24                   | Zfp281              | AT2G15740                 |
| WRKY75                   | At1g75490           | HIF-1b                    |
| AT3G25990                | ATHB25              | GRHL2                     |
| AP-2alpha                | Hoxc9               | NF1-halfsite              |
| WRKY6                    | NFkB-p65            | KLF10                     |
| WRKY33                   | Foxa3               | Pdx1                      |
| Hnf1                     | NFkB-p65-Rel        | FOXK2                     |
| WRKY18                   | FoxD3               | Tbx5                      |
| COUP-TFII                | ANAC079             | CTCF                      |
| Egr2                     | Six1                | ATHB33                    |
| Foxh1                    | Unknown-ESC-element | ASHR1                     |
| OBP3                     | CRC                 | p73                       |
| bZIP52                   | LIN-39              | ANAC038                   |
| WRKY15                   | Cdx2                | Npas4                     |
| AT2G28810                | PAX3:FKHR-fusion    | p63                       |
| GBF6                     | MYB62               | En1                       |
| LBD2                     | Hoxa13              | HuR                       |
| Unknown(Homeobox)        | AT5G02460           | FoxL2                     |
| Mef2b                    | Mef2c               | MYB65                     |
| ZNF652/HepG2-ZNF652.Flag |                     | Reverb                    |
| MafF                     |                     | bZIP:IRF                  |
| WRKY26                   |                     | p53                       |
| CDX4                     |                     | LHX9                      |
| WRKY31                   |                     | Hoxd13                    |
| WRKY28                   |                     | ANAC046                   |
| WRKY55                   |                     | MYB101                    |
| LBD19                    |                     | Stat3                     |
| Initiator/Drosophila     |                     | CDF3                      |
| WRKY20                   |                     | Egr1                      |
| BORIS                    |                     | TATA-Box                  |
| EAR2                     |                     | MYB81                     |
| Replumless               |                     | Mef2a                     |
| AT5G66940                |                     | HOXB13                    |
| AT3G12130                |                     | MYB70                     |
| PPARa                    |                     | ETS:RUNX                  |
| WRKY25                   |                     | Hoxd11                    |
| WRKY27                   |                     | Hoxa11                    |
| HOXD13(Homeobox)/Chicken |                     | Otx2                      |
| Nanog                    |                     | ANAC047                   |
| PPARE                    |                     | dof42                     |
| ZNF416                   |                     |                           |
| WRKY40                   |                     |                           |
| AT5G63260                |                     |                           |
| Sox17                    |                     |                           |
| WRKY65                   |                     |                           |

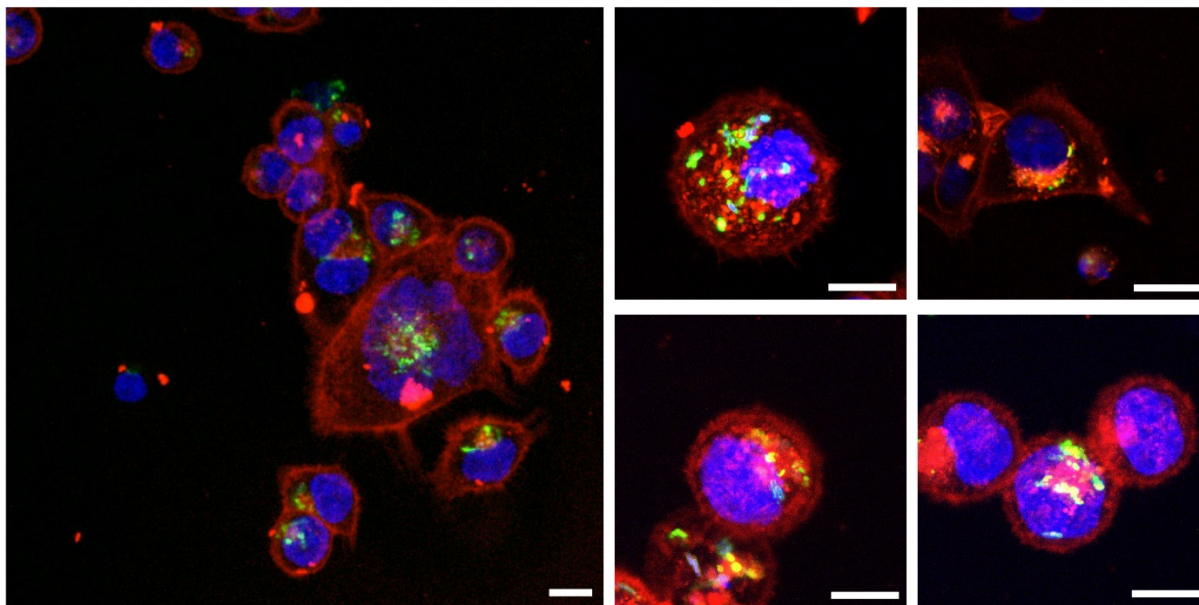

**Supplementary Figure 1.** Additional images from immunofluorescence confocal microscopy of *Fnn* infected HCT116 cells at 24 hours after initial infection. (Staining: Host membrane red: Membrite 568, Host nucleus blue: NucBlue, *Fnn* green: FM 1-43FX). Scale bar 10μm.

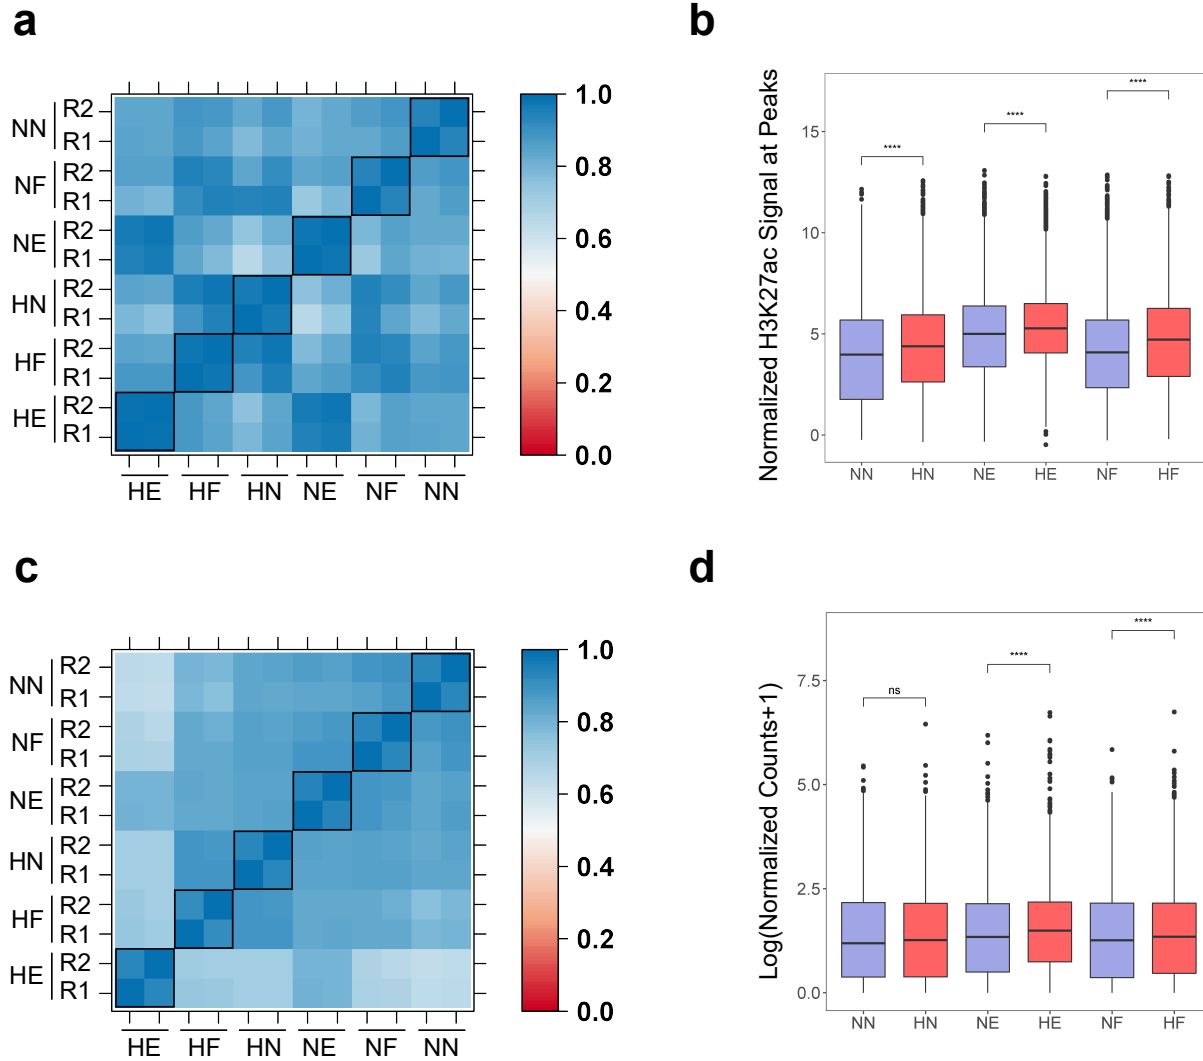

**Supplementary Figure 2.** H3K27ac and RNA-seq data under various conditions. **a** Pearson correlation of normalized H3K27ac signal around promoter regions (TSS +/- 2 kb). **b** Distribution of normalized H3K27ac signal at peaks. Each data point represents the normalized H3K27ac signal at a peak. The central line of the boxplot represents the median. The upper and lower boundaries of the box delineate the 75th and 25th percentiles, respectively. Each whisker extends to a distance of 1.5 times the interquartile range from the box's edges. **c** Pearson correlation of normalized RNA-seq counts at genes. **d** Boxplots of RNA-seq counts at genes. Each data point represents the normalized read counts at a gene. The central line of the boxplot represents the median. The upper and lower boundaries of the box delineate the 75th and 25th percentiles, respectively. Each whisker extends to a distance of 1.5 times the interquartile range from the box's edges. Abbreviations: NN: Normoxia - No Bacteria, NF: Normoxia - infection with *Fnn*, NE: Normoxia - infection with *E. coli*, HN: Hypoxia - No Bacteria, HF: Hypoxia - infection with *Fnn*, and HE: Hypoxia - infection with *E. coli*. ns (not significant), \*\*\*\* p < 0.0001.

**a****NN-NE GO Biological Process**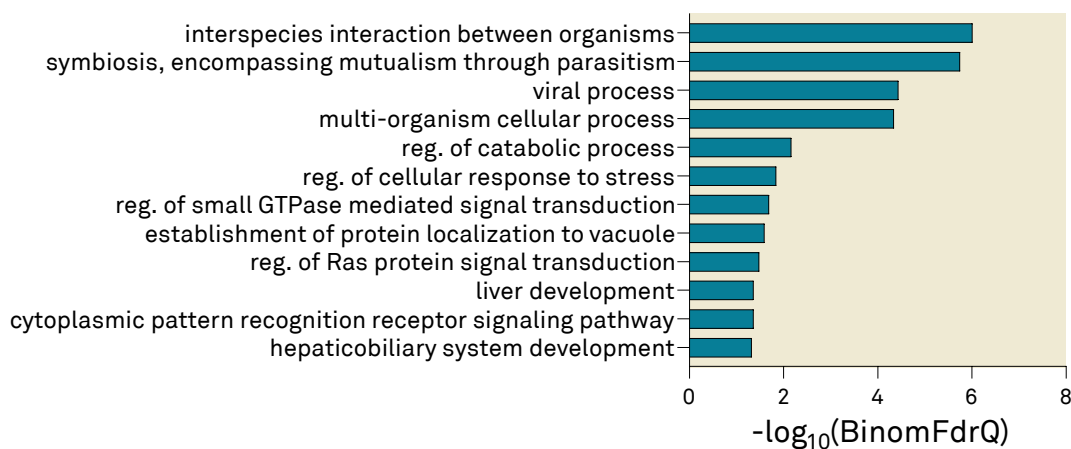**b****NN-HE GO Biological Process**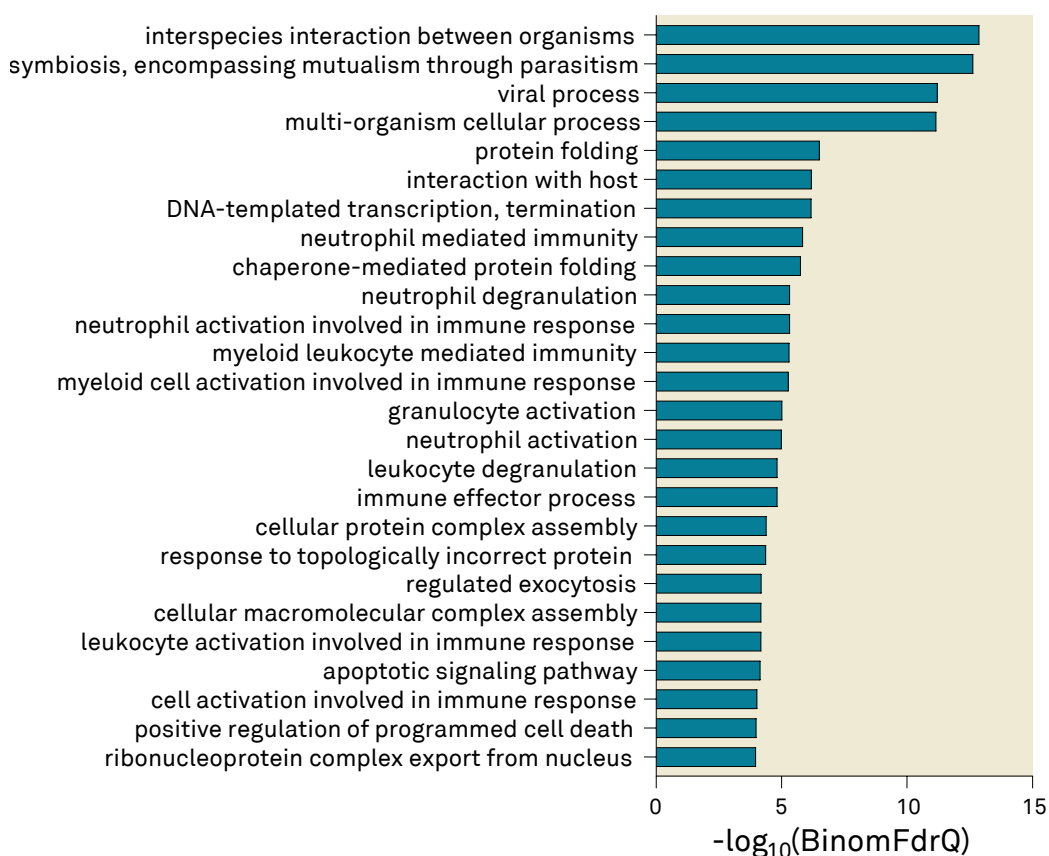

**Supplementary Figure 3.** Enhancer GO Term enrichment analysis of *E. coli* data. **a** NN-NE. **b** NN-HE. Abbreviations: NN: Normoxia - No Bacteria, NE: Normoxia - infection with *E. coli*, and HE: Hypoxia - infection with *E. coli*.

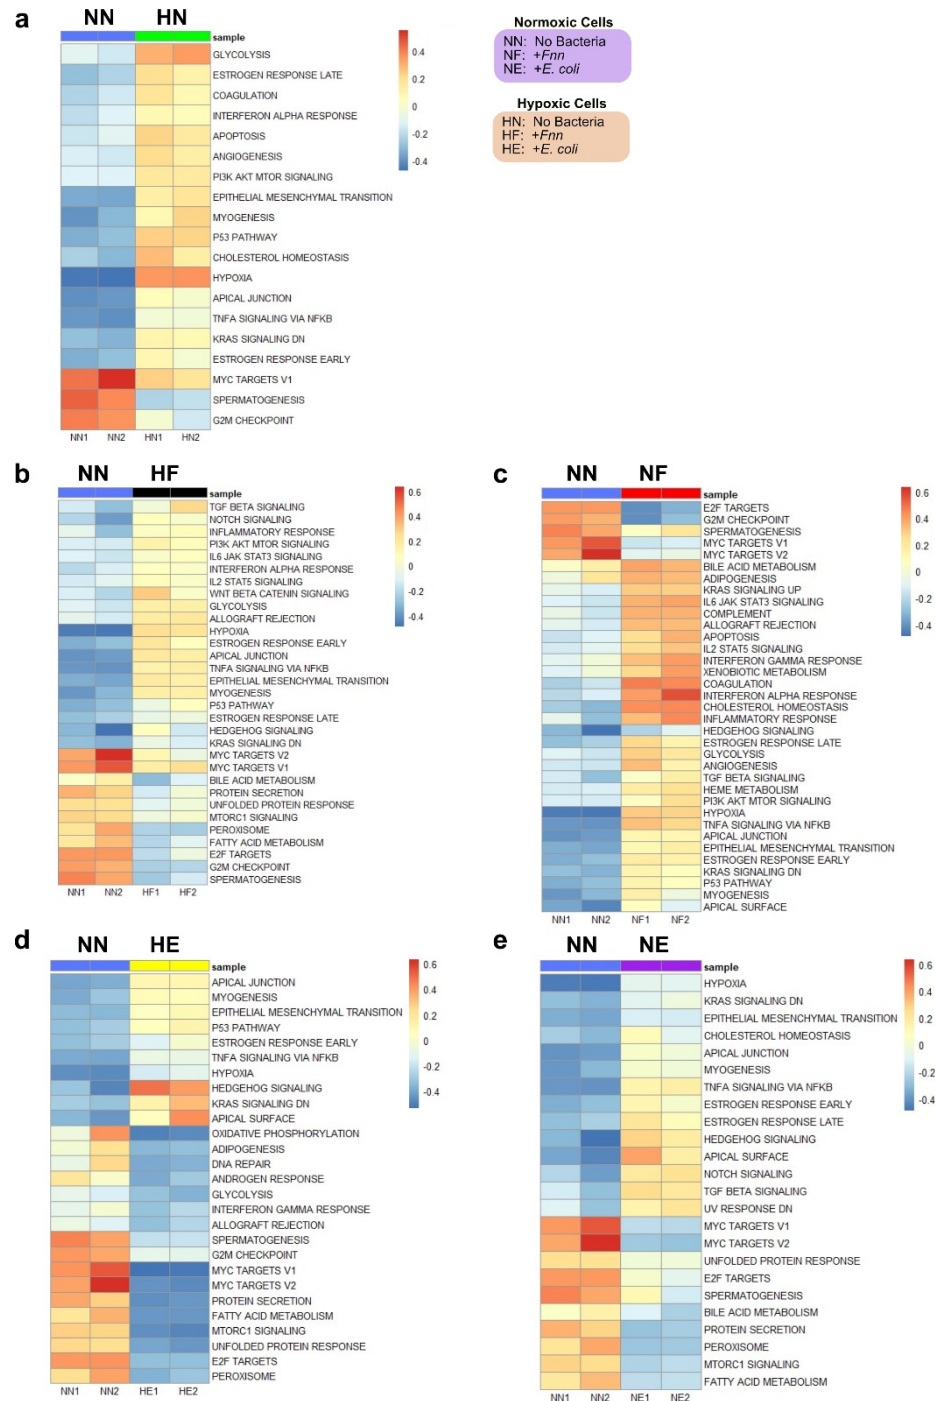

**Supplementary Figure 4.** Pairwise comparisons of GSVA analysis of RNA-seq data for *Fnn* and *E. coli* infection in normoxia and hypoxia. **a** NN-HN. **b** NN-HF. **c** NN-NF. **d** NN-HE. **e** NN-NE. Abbreviations: NN: Normoxia - No Bacteria, NF: Normoxia - infection with *Fnn*, NE: Normoxia - infection with *E. coli*, HN: Hypoxia - No Bacteria, HF: Hypoxia - infection with *Fnn*, and HE: Hypoxia - infection with *E. coli*.

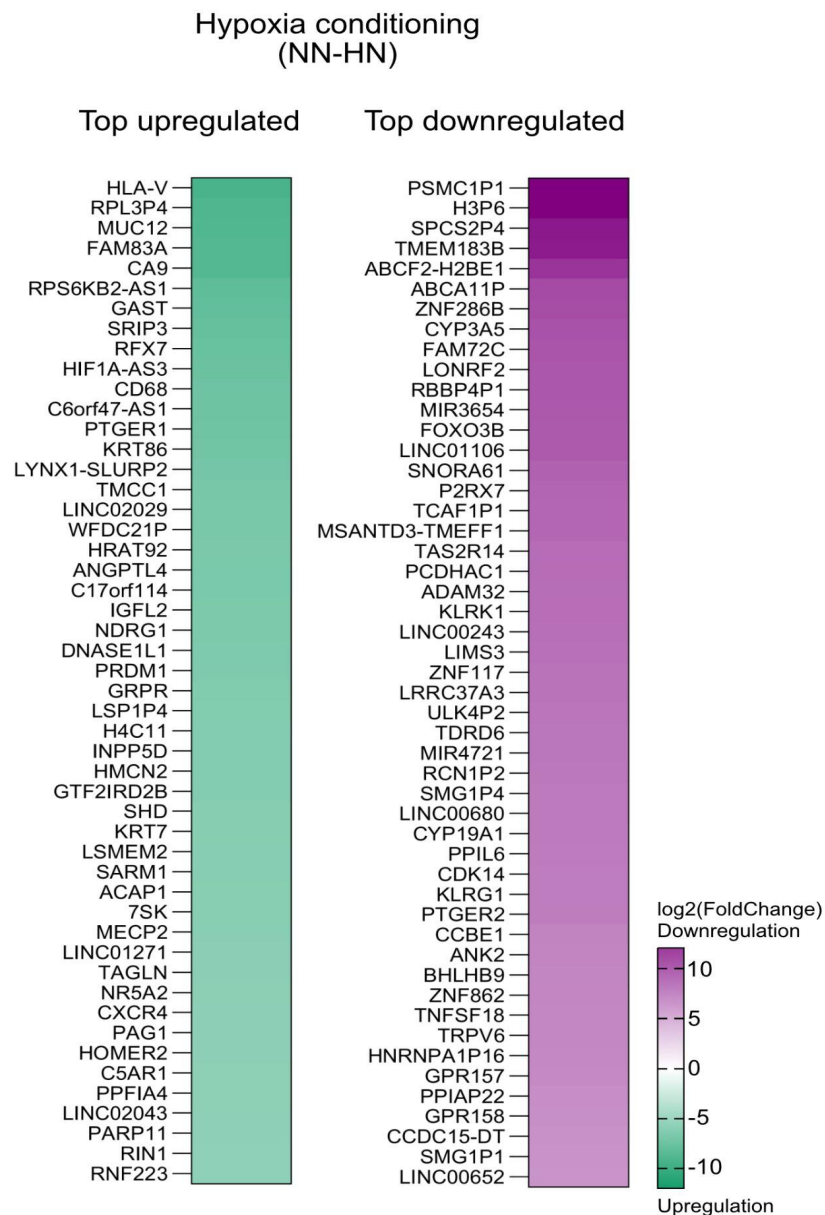

**Supplementary Figure 5.** Differentially expressed genes in hypoxia conditioned cells. Top 50 upregulated and downregulated DEGs in uninfected hypoxia conditioned cells. Abbreviations: NN: Normoxia - No Bacteria, and HN: Hypoxia - No Bacteria.



*Fnn* infection of normoxia conditioned cells  
(NN-NF)

*Fnn* infection of hypoxia conditioned cells  
(NN-HF)

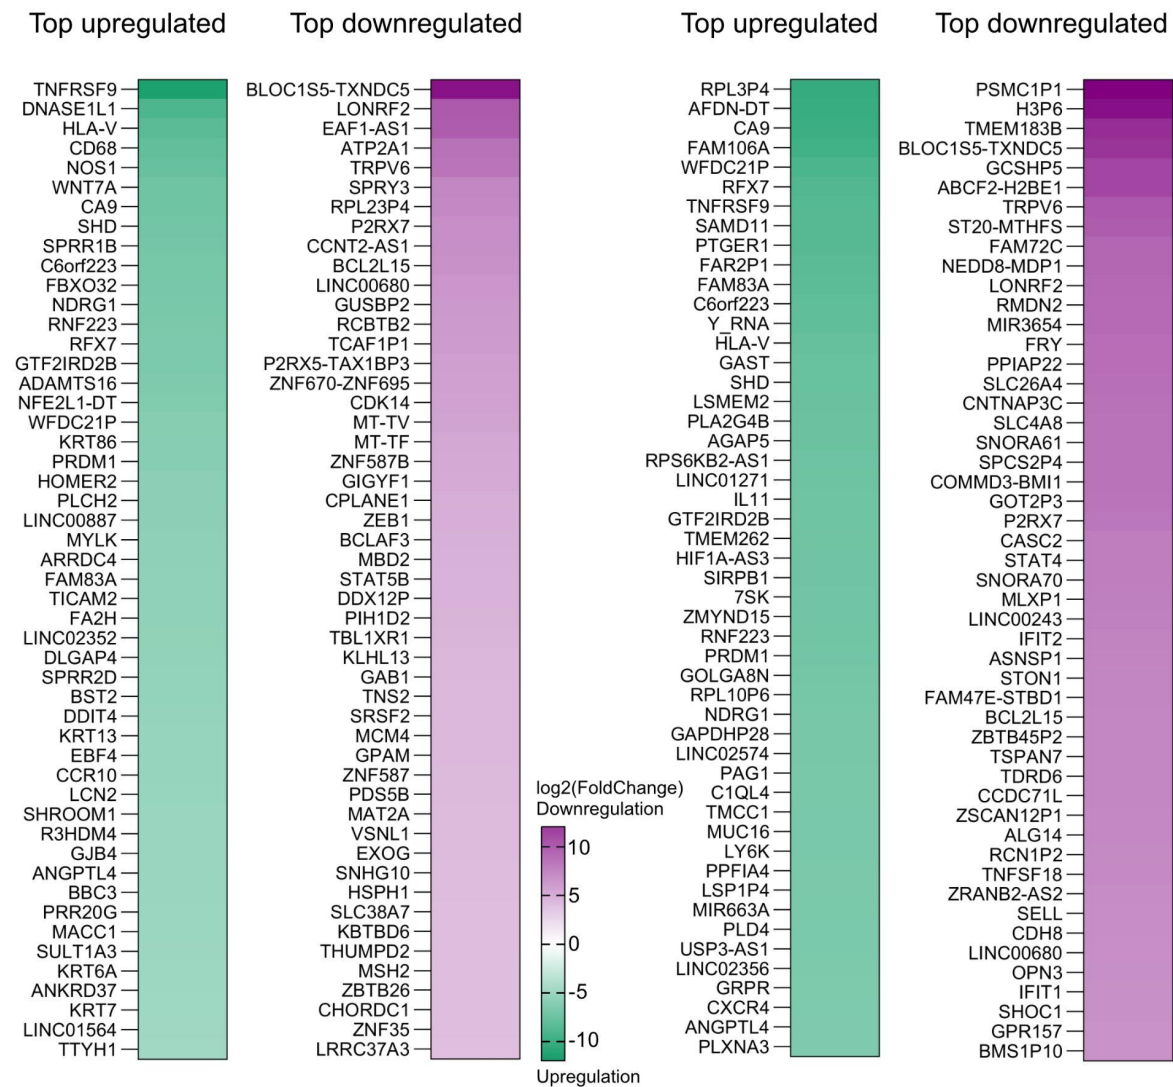

**Supplementary Figure 6.** Differentially expressed genes in normoxia and hypoxia conditioned cells upon infection with *F. nucleatum*. Top 50 upregulated and downregulated DEGs in normoxia and hypoxia conditioned cells infected with *Fnn*. Abbreviations: NN: Normoxia - No Bacteria, NF: Normoxia - infection with *Fnn*, HN: Hypoxia - No Bacteria, and HF: Hypoxia - infection with *Fnn*.

*E. coli* infection of normoxia conditioned cells  
(NN-NE)

*E. coli* infection of hypoxia conditioned cells  
(NN-HE)

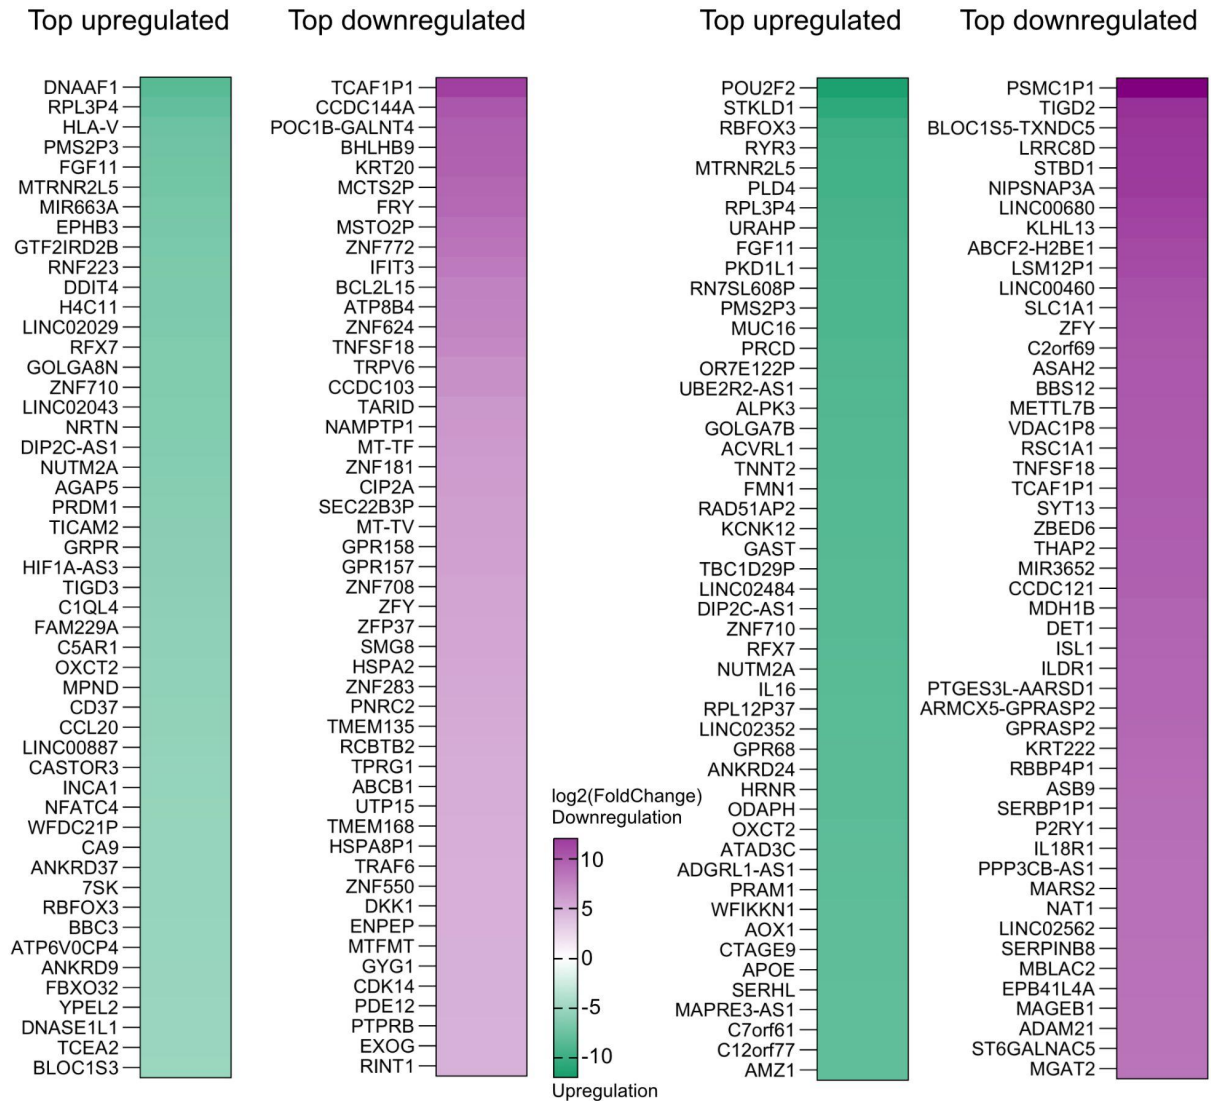

**Supplementary Figure 7.** Differentially expressed genes in normoxia and hypoxia conditioned cells upon infection with *E. coli*. Top 50 upregulated and downregulated DEGs in normoxia and hypoxia conditioned cells infected with *E. coli*. Abbreviations: NN: Normoxia - No Bacteria, NE: Normoxia - infection with *E. coli*, HN: Hypoxia - No Bacteria, and HE: Hypoxia - infection with *E. coli*.
